# Supplementary material
Source: PubMed Central journal article supplement (PMC3953892)
Supplement: ct4009359_si_001.pdf [file ct4009359_si_001.pdf]

## Supporting Information – Mathematical steps to obtain Eq 7 and 8

The hydration free energy can be decomposed into an electrostatic and non-polar components

$$\Delta G = \Delta G_{ele} + \Delta G_{np}$$

It is well known that components of the free energy can be path or process dependent. We follow a well-defined, widely used process for our decomposition. In simulations as well as liquid state theories, the non-polar component can be computed by setting all the solute atomic partial charges to zero, keeping the solute Lennard-Jones potential and solving the integral equation numerically. Then  $\Delta G_{ele}$  is computed by subtracting  $\Delta G_{np}$  from  $\Delta G$ . These hydration free energies here are calculated with the analytical chemical potential formula for the KH closure of 3D-RISM defined as

$$\Delta G = k_B T \sum_{\alpha=O,H} \int_V d\vec{r}^3 \left[ \frac{\Delta\rho_\alpha(\vec{r})^2}{2\rho_\alpha} \theta(-\Delta\rho_\alpha(\vec{r})) - c_\alpha(\vec{r}) \left[ \rho_\alpha + \frac{\Delta\rho_\alpha(\vec{r})}{2} \right] \right]$$

where  $k_B$  is the Boltzmann constant,  $T$  is the temperature in Kelvin,  $\alpha$  is the solvent particle label,  $\rho_\alpha$  is the bulk density of solvent particle  $\alpha$ ,  $c_\alpha(\vec{r})$  is the direct correlation function, the  $\Delta\rho_\alpha(\vec{r})$  is the excess solvent density compared to bulk and is defined as  $\Delta\rho_\alpha(\vec{r}) = \rho_\alpha(\vec{r}) - \rho_\alpha$  with  $\rho_\alpha(\vec{r})$  the density of solvent particle  $\alpha$ ,  $\theta(-\Delta\rho_\alpha(\vec{r}))$  is a step function that is zero when the solvent density is below bulk density and  $V$  is the overall volume of integration.

Now, we define a new free energy functional for which the non-polar direct correlation function is scaled by a constant  $\gamma$  but only within the solvent exclusion volume

$$\begin{aligned}
\Delta G^\gamma &= \Delta G_{ele} + k_B T \sum_\alpha \int_V d\bar{r}^3 \left[ \frac{\Delta \rho_\alpha^{np}(\bar{r})^2}{2\rho_\alpha} \theta(-\Delta \rho_\alpha^{np}(\bar{r})) - c_\alpha^{np}(\bar{r}) \left[ \rho_\alpha + \frac{\Delta \rho_\alpha^{np}(\bar{r})}{2} \right] \right] \\
&= \Delta G_{ele} + k_B T \sum_\alpha \int_{V_{ext}} d\bar{r}^3 \left[ \frac{\Delta \rho_\alpha^{np}(\bar{r})^2}{2\rho_\alpha} \theta(-\Delta \rho_\alpha^{np}(\bar{r})) - c_\alpha^{np}(\bar{r}) \left[ \rho_\alpha + \frac{\Delta \rho_\alpha^{np}(\bar{r})}{2} \right] \right] \\
&\quad + k_B T \sum_\alpha \int_{V_{in}} d\bar{r}^3 \left[ \frac{\Delta \rho_\alpha^{np}(\bar{r})^2}{2\rho_\alpha} \theta(-\Delta \rho_\alpha^{np}(\bar{r})) - \gamma \cdot c_\alpha^{np}(\bar{r}) \left[ \rho_\alpha + \frac{\Delta \rho_\alpha^{np}(\bar{r})}{2} \right] \right]
\end{aligned}$$

In this new integral, we have partitioned the integration domain into the solvent exclusion domain  $V_{in}$  and the external volume  $V_{ext}$ . We can now use the following identity  $\gamma \cdot c_\alpha^{np}(\bar{r}) = c_\alpha^{np}(\bar{r}) - (1-\gamma) \cdot c_\alpha^{np}(\bar{r})$

to rewrite the above equation in order to simplify the equations

$$\begin{aligned}
\Delta G^\gamma &= \Delta G_{ele} + k_B T \sum_\alpha \int_{V_{ext}} d\bar{r}^3 \left[ \frac{\Delta \rho_\alpha^{np}(\bar{r})^2}{2\rho_\alpha} \theta(-\Delta \rho_\alpha^{np}(\bar{r})) - c_\alpha^{np}(\bar{r}) \left[ \rho_\alpha + \frac{\Delta \rho_\alpha^{np}(\bar{r})}{2} \right] \right] \\
&\quad + k_B T \sum_\alpha \int_{V_{in}} d\bar{r}^3 \left[ \frac{\Delta \rho_\alpha^{np}(\bar{r})^2}{2\rho_\alpha} \theta(-\Delta \rho_\alpha^{np}(\bar{r})) - (c_\alpha^{np}(\bar{r}) - (1-\gamma) \cdot c_\alpha^{np}(\bar{r})) \cdot \left[ \rho_\alpha + \frac{\Delta \rho_\alpha^{np}(\bar{r})}{2} \right] \right] \\
&= \Delta G_{ele} + k_B T \sum_\alpha \int_{V_{ext}} d\bar{r}^3 \left[ \frac{\Delta \rho_\alpha^{np}(\bar{r})^2}{2\rho_\alpha} \theta(-\Delta \rho_\alpha^{np}(\bar{r})) - c_\alpha^{np}(\bar{r}) \left[ \rho_\alpha + \frac{\Delta \rho_\alpha^{np}(\bar{r})}{2} \right] \right] \\
&\quad + k_B T \sum_\alpha \int_{V_{in}} d\bar{r}^3 \left[ \frac{\Delta \rho_\alpha^{np}(\bar{r})^2}{2\rho_\alpha} \theta(-\Delta \rho_\alpha^{np}(\bar{r})) - c_\alpha^{np}(\bar{r}) \left[ \rho_\alpha + \frac{\Delta \rho_\alpha^{np}(\bar{r})}{2} \right] \right] \\
&\quad + k_B T \sum_\alpha \int_{V_{in}} d\bar{r}^3 \left[ (1-\gamma) \cdot c_\alpha^{np}(\bar{r}) \cdot \left[ \rho_\alpha + \frac{\Delta \rho_\alpha^{np}(\bar{r})}{2} \right] \right] \\
&= \Delta G_{ele} + \Delta G_{np} + k_B T (1-\gamma) \sum_\alpha \rho_\alpha \int_{V_{in}} d\bar{r}^3 \left[ c_\alpha^{np}(\bar{r}) \cdot \left[ 1 + \frac{\Delta \rho_\alpha^{np}(\bar{r})}{2\rho_\alpha} \right] \right]
\end{aligned}$$

This is eq 7 of the main text. In the development above, we have reassembled the

$V_{in}$  and  $V_{ext}$  components to recover the  $\Delta G$  plus a correction term that depends on the constant  $\gamma$ . Since the domain of  $V_{in}$  is by definition a region of negligible solvent density, it is reasonable to set the non-polar solvent density to zero. This simplifies the rightmost term of above equation to  $\frac{1}{2}$  given that density excess is minus the bulk density

$$\rho_\alpha^{np}(\vec{r})=0 \Rightarrow 1 + \frac{\Delta\rho_\alpha^{np}(\vec{r})}{2\rho_\alpha} = 1 + \frac{-\rho_\alpha}{2\rho_\alpha} = \frac{1}{2}$$

and we directly find that  $\Delta G^\gamma$  is given by

$$\begin{aligned} \Delta G^\gamma &= \Delta G_{ele} + \Delta G_{np} + \frac{k_B T}{2} (1-\gamma) \sum_\alpha \rho_\alpha \int_{V_{in}} d\vec{r}^3 c_\alpha^{np}(\vec{r}) \\ &= \Delta G_{KH} + \frac{k_B T}{2} (1-\gamma) \sum_\alpha \rho_\alpha \int_{V_{in}} d\vec{r}^3 c_\alpha^{np}(\vec{r}) \end{aligned}$$

Applying the idea that the water oxygen particle mostly define the exclusion volume since this is the largest atom at the center of the molecule, one finds equation 8 from the main text

$$\Delta G^c = \Delta G_{KH} + \frac{k_B T \rho_o}{2} (1-\gamma) \int_{V_{in}} d\vec{r}^3 c_o^{np}(\vec{r})$$

We note that in this form, the correction has the functional form in the KH 3D-RISM free energy of a bridge function-like correction on the interior of the solute.
